# Supplementary material
Source: MDPI journal article supplement (https://www.mdpi.com/2077-1312/11/5/1077)
Supplement: s1 [file s1]

Archive with 1 entries (1 files):
- jmse-2353602-supplementary.pdf
